# Supplementary material for: Functional-structural decoupling in visual network is associated with cognitive decline in patients with type 2 diabetes mellitus: Evidence from a multimodal MRI analysis
Source: Research Square preprint supplement (doi:10.21203/rs.3.rs-2271052/v1), 2022-11-18
Supplement: Supplementary file 1 [file eafa8c11ca94fb948492922a.docx]

**Table S1** Neuropsychological assessments of T2DM group and HC group.

|  | T2DM (n=30) | HC (n=29) | *P* |
| --- | --- | --- | --- |
| **MMSE** |  |  |  |
| Total | 28.67 ± 1.21 | 28.61 ± 1.26 | 0.859 |
| Orientation | 9.84 ± 0.37 | 9.96 ± 0.19 | 0.143 |
| Registration | 2.96 ± 0.20 | 2.96 ± 0.19 | 0.936 |
| Attention and Calculation | 4.48 ± 0.87 | 4.46 ± 0.79 | 0.945 |
| Recall | 2.60 ± 0.58 | 2.36 ± 0.83 | 0.226 |
| Language and Praxis | 8.76 ± 0.52 | 8.86 ± 0.36 | 0.429 |
| **MoCA** |  |  |  |
| Total | 27.07 ± 1.80 | 26.46 ± 2.47 | 0.291 |
| Executive Functions | 0.75 ± 0.44 | 0.89 ± 0.31 | 0.169 |
| Visuospatial Abilities | 3.43 ± 0.74 | 3.39 ± 0.74 | 0.857 |
| Naming Ability | 3.00 ± 0.00 | 2.86 ± 0.36 | 0.043* |
| Concentration | 5.68 ± 0.86 | 5.61 ± 0.63 | 0.725 |
| Language | 2.89 ± 0.31 | 2.86 ± 0.45 | 0.732 |
| Verbal abstraction | 1.75 ± 0.52 | 1.54 ± 0.69 | 0.196 |
| Recall | 3.11 ± 1.40 | 2.93 ± 1.65 | 0.664 |
| Orientation | 5.96 ± 0.19 | 6.00 ± 0.00 | 0.336 |
| **CVLT** |  |  |  |
| Trial 1 | 4.68 ± 1.84 | 5.15 ± 1.79 | 0.357 |
| Trial 2 | 7.60 ± 2.87 | 8.22 ± 2.28 | 0.389 |
| Trial 3 | 9.32 ± 2.94 | 10.30 ± 2.69 | 0.217 |
| Trial 4 | 9.96 ± 2.73 | 11.63 ± 2.65 | 0.030* |
| Trial 5 | 11.04 ± 3.13 | 12.59 ± 2.48 | 0.052 |
| Total trial 1-5 | 40.72 ± 14.00 | 47.89 ± 9.37 | 0.034* |
| Trial B | 4.64 ± 2.56 | 5.37 ± 2.37 | 0.291 |
| Short-delay free recall | 8.36 ± 3.70 | 10.11 ± 3.43 | 0.083 |
| Short-delay cued recall | 9.16 ± 2.75 | 11.00 ± 2.32 | 0.012* |
| Free recall intrusions | 6.96 ± 5.31 | 4.07 ± 4.67 | 0.042* |
| Cued recall intrusions | 4.28 ± 3.87 | 2.59 ± 3.49 | 0.104 |
| Total intrusions | 11.24 ± 8.13 | 6.67 ± 7.65 | 0.042* |
| Total repetitions | 6.67 ± 6.71 | 5.33 ± 4.29 | 0.397 |
| Forced-choice recognition | 98.50 ± 3.27 | 99.31 ± 2.00 | 0.295 |
| **SCWT** |  |  |  |
| Correct | 31.07 ± 12.44 | 37.93 ± 18.05 | 0.107 |
| Error | 38.59 ± 12.91 | 38.89 ± 14.77 | 0.935 |
| Omission | 50.97 ± 16.14 | 40.37 ± 14.67 | 0.013* |
| Congruent Correct | 4.90 ± 2.38 | 6.15 ± 3.59 | 0.134 |
| Congruent RT | 195.55 ± 105.86 | 252.67 ± 187.37 | 0.172 |
| Incongruent Correct | 14.00 ± 7.20 | 16.19 ± 7.13 | 0.259 |
| Incongruent RT | 525.97 ± 359.57 | 625.89 ± 410.50 | 0.336 |
| Pronunciation Relevant Correct | 3.38 ± 2.04 | 4.88 ± 3.39 | 0.056 |
| Pronunciation Relevant RT | 130.72 ± 91.07 | 184.70 ± 177.75 | 0.165 |
| Irrelevant Correct | 8.97 ± 4.08 | 11.50 ± 6.39 | 0.091 |
| Irrelevant RT | 342.59 ± 216.26 | 438.56 ± 321.73 | 0.200 |
| **WCST** |  |  |  |
| Total responses | 109.86 ± 20.13. | 103.96 ± 19.48 | 0.281 |
| Correct response | 62.45 ± 15.78 | 68.60 ± 9.76 | 0.097 |
| Correct responses % | 58.94 ± 18.25 | 19.46 ± 31.35 | 0.000** |
| Total errors | 48.11 ± 27.78 | 35.36 ± 19.10 | 0.055 |
| Total errors % | 41.06 ± 18.25 | 9.26 ± 15.87 | 0.000** |
| Total perseverative responses | 27.07 ± 22.47 | 17.92 ± 10.62 | 0.061 |
| Total perseverative responses % | 22.81 ± 16.63 | 5.26 ± 9.09 | 0.000** |
| Perseverative errors | 6.89 ± 10.25 | 7.04 ± 5.26 | 0.949 |
| Perseverative errors % | 6.18 ± 8.03 | 2.80 ± 5.26 | 0.079 |
| Total non-perseverative errors | 40.82 ± 25.30 | 28.32 ± 19.54 | 0.051 |
| Total non-perseverative errors % | 34.87 ± 17.53 | 6.46 ± 12.48 | 0.000** |
| Conceptual responses | 55.18 ± 18.30 | 64.60 ± 10.40 | 0.024* |
| Conceptual responses % | 53.30 ± 21.52 | 18.47 ± 29.94 | 0.000** |
| Categories completed | 4.66 ± 1.91 | 5.52 ± 1.05 | 0.042* |
| Trials to complete first category | 17.71 ± 9.91 | 18.52 ± 12.15 | 0.792 |
| Failure to maintain set | 0.64 ± 0.95 | 1.12 ±1.27 | 0.132 |
| Learning to learn | -0.16 ± 0.57 | 0.01 ± 0.20 | 0.183 |
| Time | 634.11 ± 280.35 | 502.36 ± 206.04 | 0.059 |

Data were reported as mean ± SD. T2DM, type 2 diabetes mellitus; HC, healthy controls; MMSE, Mini-Mental State Examination; MoCA, Montreal Cognitive Assessment; CVLT, California Verbal Learning Test; STROOP, Stroop Color Word Test; RT, Reaction time; WCST, Wisconsin Card Sorting Test. **P* < 0.05; ** *P* < 0.001.

**Table S2** Functional and structural biomarkers of T2DM group and HC group.

|  | DC | | |  | ALFF | | |  | FA | | |
| --- | --- | --- | --- | --- | --- | --- | --- | --- | --- | --- | --- |
|  | T2DM | HC | *t* |  | T2DM | HC | *t* |  | T2DM | HC | *t* |
| VC1 | 0.41 ± 0.32 | 0.66 ± 0.27 | 0.003* |  | 0.18 ± 0.29 | 0.35 ± 0.32 | 0.038* |  | 0.17 ± 0.00 | 0.16 ± 0.01 | 0.332 |
| VC2 | 0.56 ± 0.37 | 0.65 ± 0.31 | 0.283 |  | 0.43 ± 0.32 | 0.53 ± 0.37 | 0.263 |  | 0.12 ± 0.00 | 0.12 ± 0.01 | 0.263 |
| VC3 | 0.34 ± 0.25 | 0.41 ± 0.30 | 0.319 |  | 0.01 ± 0.18 | 0.09 ± 0.21 | 0.151 |  | 0.17 ± 0.01 | 0.17 ± 0.01 | 0.703 |

Data were reported as mean ± SD. T2DM, type 2 diabetes mellitus; HC, healthy controls; DC, degree centrality; ALFF, amplitude of low-frequency fluctuation; FA, fractional anisotropy; VC1, visual component 1; VC2, visual component 2; VC3, visual component 3. **P* < 0.05 after false discovery rate multiple comparison.

**Table S3** Functional-structural coupling biomarkers of T2DM group and HC group.

|  | DC-FA | | |  | ALFF-FA | | |
| --- | --- | --- | --- | --- | --- | --- | --- |
|  | T2DM | HC | *t* |  | T2DM | HC | *t* |
| VC1 | 0.34 ± 0.27 | 0.49 ± 0.17 | 0.014* |  | 0.07 ± 0.28 | 0.06 ± 0.30 | 0.967 |
| VC2 | 0.28 ± 0.22 | 0.30 ± 0.19 | 0.793 |  | 0.06 ± 0.16 | 0.02 ± 0.21 | 0.413 |
| VC3 | 0.11 ± 0.18 | 0.15 ± 0.19 | 0.372 |  | -0.21 ±0.16 | -0.21 ± 0.20 | 0.970 |

Data were reported as mean ± SD. T2DM, type 2 diabetes mellitus; HC, healthy controls; DC, degree centrality; ALFF, amplitude of low-frequency fluctuation; FA, fractional anisotropy; VC1, visual component 1; VC2, visual component 2; VC3, visual component 3. **P* < 0.05 false discovery rate multiple comparison.

**Table S3** In T2DM patients, correlation between cognitive function or the disease severity and imaging biomarkers in VC1.

|  | DC | |  | ALFF | |  | DC-FA | |
| --- | --- | --- | --- | --- | --- | --- | --- | --- |
|  | *r* | *P*FDR |  | *r* | *P*FDR |  | *r* | *P*FDR |
| **Cognitive function** |  |  |  |  |  |  |  |  |
| **CVLT** |  |  |  |  |  |  |  |  |
| Trial 4 | 0.655 | 0.001* |  | 0.456 | 0.117 |  | 0.109 | 0.743 |
| Total trial 1-5 | 0.543 | 0.040* |  | 0.373 | 0.117 |  | 0.072 | 0.837 |
| Short-delay cued recall | 0.507 | 0.053 |  | 0.432 | 0.124 |  | 0.193 | 0.716 |
| Free recall intrusions | -0.385 | 0.181 |  | -0.378 | 0.198 |  | -0.192 | 0.716 |
| Total intrusions | -0.395 | 0.181 |  | -0.463 | 0.117 |  | -0.116 | 0.743 |
| **SCWT** |  |  |  |  |  |  |  |  |
| Omission | -0.115 | 0.821 |  | -0.137 | 0.588 |  | 0.209 | 0.716 |
| **WCST** |  |  |  |  |  |  |  |  |
| Correct response % | 0.059 | 0.821 |  | 0.290 | 0.270 |  | -0.218 | 0.716 |
| Total errors % | -0.059 | 0.821 |  | -0.290 | 0.270 |  | 0.218 | 0.716 |
| Total perseverative responses % | 0.313 | 0.240 |  | 0.029 | 0.885 |  | 0.640 | 0.001* |
| Total non-perseverative errors % | -0.083 | 0.821 |  | -0.255 | 0.340 |  | 0.102 | 0.743 |
| Conceptual responses | -0.350 | 0.181 |  | -0.207 | 0.423 |  | -0.002 | 0.990 |
| Conceptual responses% | 0.090 | 0.821 |  | 0.293 | 0.270 |  | -0.215 | 0.716 |
| Categories completed | 0.166 | 0.780 |  | 0.170 | 0.504 |  | -0.119 | 0.743 |
| **Disease severity** |  |  |  |  |  |  |  |  |
| FBG | 0.093 | 0.821 |  | 0.231 | 0.350 |  | -0.294 | 0.716 |
| HbA1c | 0.152 | 0.798 |  | 0.066 | 0.793 |  | 0.109 | 0.743 |
| disease duration | 0.007 | 0.977 |  | 0.103 | 0.793 |  | 0.028 | 0.975 |

Data were reported as mean ± SD. VC1, visual component 1; T2DM, type 2 diabetes mellitus; HC, healthy controls; DC, degree centrality; FA, fractional anisotropy; CVLT, California Verbal Learning Test; STROOP, Stroop Color Word Test; WCST, Wisconsin Card Sorting Test; FBG, fasting blood glucose; HbA1c, hemoglobin A1C. **P* < 0.05.

**
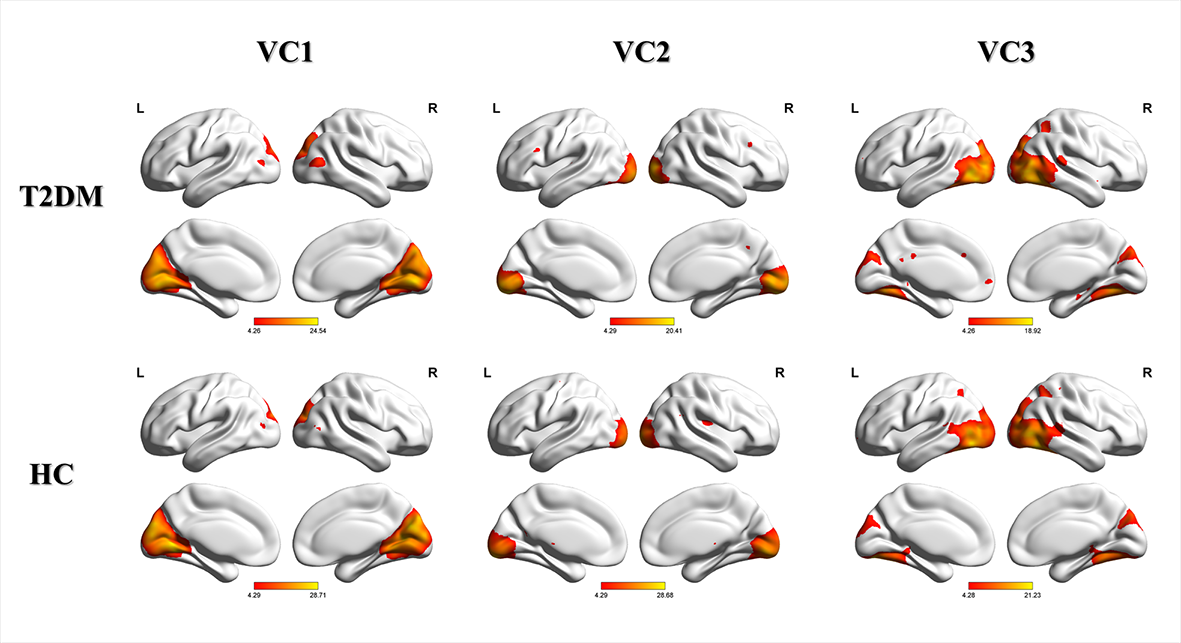
**

**Figure S1.** **The spatial patterns of three intrinsic connectivity networks ( VC1, VC2, and VC3)**

**in T2DM and HC groups using one-sample t-tests.** VC: visual component; T2DM: type 2 diabetes mellitus; HC: healthy controls.

The resting-state fMRI adopted gradient-echo planar sequence sensitive to blood oxygen level-dependent (BOLD) contrast with the following settings: (TE)/repetition time (TR) = 30/2000 ms, flip angle (FA) = 90°, acquisition matrix = 64 × 64, field of view = 220 mm × 220 mm, thickness = 3 mm, scanning gap = 1 mm, slices number = 36 and scan time = 6 min. The brain structural images were obtained using a three-dimensional brain volume (3D-BRAVO) sequence with the following parameters: TE/TR = 3.2/8.2 ms, inversion time (TI) = 450 ms, FA = 12°, acquisition matrix = 256 × 256, slice thickness = 1 mm, slice number = 188. The 64 direction DTI acquisition was added after anatomical imaging, using a spin echo single-shot echo planar imaging sequence, two b-values (0 and 1000 s/mm2 ) and the following parameters: TR/TE = 6000/minimize ms, acquisition matrix = 128 × 128, thickness = 3 mm, no scanning gap, slices number = 50.
